1     **Undocumented potential for primary productivity in a globally-distributed**  
2                                    **bacterial photoautotroph**

3                                    **Authors:** E.D. Graham<sup>1</sup>, J.F. Heidelberg<sup>1,2</sup>, B.J. Tully<sup>\*1,2</sup>

4     **Author Affiliations:**

5     <sup>1</sup>Department of Biological Sciences, University of Southern California, Los Angeles, CA, USA

6     <sup>2</sup>Center for Dark Energy Biosphere Investigations, University of Southern California, Los  
7     Angeles, CA, USA

8     \*Corresponding Author: Benjamin Tully, [tully.bj@gmail.com](mailto:tully.bj@gmail.com)

9     Keywords: autotrophy; marine carbon cycle; metagenomics; Alphaproteobacteria; aerobic  
10    anoxygenic phototrophs

11

12 **Abstract:** Aerobic anoxygenic phototrophs (AAnPs) are common in the global oceans and are  
13 associated with photoheterotrophic activity. To date, AAnPs have not been identified in the  
14 surface ocean that possess the potential for carbon fixation. Using the *Tara Oceans* metagenomic  
15 dataset, we have reconstructed draft genomes of four bacteria that possess the genomic potential  
16 for anoxygenic phototrophy, carbon fixation via the Calvin-Benson-Bassham cycle, and the  
17 oxidation of sulfite and thiosulfate. Forming a monophyletic clade within the  
18 *Alphaproteobacteria* and lacking cultured representatives, the organisms compose minor  
19 constituents of local microbial communities (0.1-1.0%), but are globally distributed, present in  
20 multiple samples from the North Pacific, Mediterranean Sea, the East Africa Coastal Province,  
21 and the South Atlantic. These organisms represent a shift in our understanding of microbially-  
22 mediated photoautotrophy in the global oceans and provide a previously undiscovered route of  
23 primary productivity.

24  
25 **Significance Statement:** In examining the genomic content of organisms collected during the  
26 *Tara Oceans* expedition, we have identified a novel clade within the *Alphaproteobacteria* that  
27 has the potential for photoautotrophy. Based on genome observations, these organisms have the  
28 potential to couple inorganic sulfur compounds as electron donors to fix carbon into biomass.  
29 They are globally distributed, present in samples from the North Pacific, Mediterranean Sea, East  
30 Africa Coastal Current, and the South Atlantic. This discovery may require re-examination of the  
31 microbial communities in the global ocean to understand and constrain the impacts of this group  
32 of organisms on the global carbon cycle.

## 33 Introduction

34 It has been understood for decades that the basis of the global marine carbon cycle are  
35 oxygenic photoautotrophs that perform photoautotrophic processes. Two additional phototrophic  
36 processes are common in the ocean and are mediated by proteorhodopsin-containing  
37 microorganisms and aerobic anoxygenic phototrophs (AAnPs). Proteorhodopsins and AAnPs  
38 have historically been associated with photoheterotrophy<sup>1,2</sup>, a process that supplements  
39 additional energy to microorganisms beyond what is obtained as part of a heterotrophic  
40 metabolic strategy. AAnPs utilize type-II photochemical reaction centers (RCIIs) and  
41 bacteriochlorophyll (BChl), are globally distributed<sup>3</sup>, and have been identified in  
42 phylogenetically diverse groups of microorganisms<sup>4-6</sup>. Though anaerobic microorganisms with  
43 RCIIs and BChl are known to fix CO<sub>2</sub><sup>7</sup> and marine AAnPs can incorporate inorganic carbon via  
44 anaplerotic reactions<sup>8</sup>, marine AAnPs have not been linked to carbon fixation<sup>9</sup>. The identification  
45 of marine AAnPs capable of carbon fixation adds to our understanding of microbial  
46 photosynthesis in the global oceans and represents a previously undiscovered route of  
47 photoautotrophy.

48 The *Tara Oceans* expedition generated microbial metagenomes during a  
49 circumnavigation of the global oceans<sup>10,11</sup>. *Tara Oceans* samples were collected from 63 sites in  
50 10 major ocean provinces, with most sites contributing multiple sampling depths (generally,  
51 surface, deep chlorophyll maximum [DCM], and mesopelagic) and multiple size fractions  
52 (generally, ‘viral’, ‘girus’ [giant virus], ‘bacterial’, and ‘protistan’) from each depth  
53 (Supplementary Data File 1). We independently assembled each sample and assemblies from all  
54 samples within a province were combined and subjected to binning techniques to reconstruct  
55 microbial genomes (Fig. 1 and Extended Data Fig. 1). Microbial genomes reconstructed from  
56 eight of ten provinces (Mediterranean, Red Sea, Arabian Sea, Indian Monsoon Gyre, East Africa  
57 Coastal, South Atlantic, and North Pacific; 36 sites, 134 samples) were annotated using the  
58 KEGG Ontology (KO) system<sup>12</sup> and examined for the genes and pathways of interest.

## 59 Results and Discussion

60 From 1,774 metagenome-assembled genomes (MAGs), 53 genomes possessed the genes  
61 encoding the core subunits of RCIIs (PufLM). Of those 53, four genomes (MED800, EAC638,  
62 SAT68, NP970; Fig. 1) also contained genes for ribulose-1,5-bisphosphate carboxylase  
63 (Rubisco; RbsLS; Fig. 2). Rubisco has four major forms, of which three (Types I, II, and III)  
64 have been shown to fix CO<sub>2</sub> and two are known to participate in the Calvin-Benson-Bassham  
65 (CBB) cycle (Types I and II<sup>13,14</sup>). Phylogenetic placement of the Rubisco large subunits recovered  
66 from the genomes revealed them to be of the Type IC/D subgroup<sup>13</sup>, suggesting that the  
67 identified proteins represent *bona fide* Rubiscos capable of carbon fixation (Fig. 2). Within the  
68 Type IC/D subgroup, the Rubisco sequences from the four analyzed genomes formed a distinct  
69 cluster with environmental sequences derived from the Global Ocean Survey (GOS)  
70 metagenomes<sup>15,16</sup>, but lacking sequences from reference organisms.

71 Similarly, the PufM sequences from the analyzed *Tara* genomes did not cluster with  
72 reference sequences, instead grouping with sequences from the GOS metagenomes<sup>15</sup>. Sequences  
73 from MED800, SAT68, and NP970 were group together in one cluster, while EAC638 was  
74 located in a separate cluster (Fig. 3). The MED800/SAT68/NP970 clade is basal to the  
75 previously identified phylogroups E and F, while the EAC638 clade is basal to the *Roseobacter*-  
76 related phylogroup G<sup>17</sup>. As MED800, EAC638, SAT68, and NP970 branch in distinct clades on

77 both the RbsL and PufM trees that consist of entirely environmental sequences, it may be  
78 possible that these clades represent a phylogenetically coherent group of organisms with the  
79 potential for both phototrophy and carbon fixation.

80 The draft genomes were of high enough quality (66-85% complete; <5.5% duplication;  
81 Table 1) to possess sufficient phylogenetic markers for accurate placement (Extended Data Table  
82 1). The four organisms form a monophyletic clade basal to the Family *Rhodobacteraceae* (Fig.  
83 4). The relationship between the genomes would suggest that NP970, SAT68, and MED800 are  
84 phylogenetically more closely related to each other than either are to EAC638. As is common  
85 with assembled metagenomic sequences, the recovered genomes lack a distinguishable 16S  
86 rRNA gene sequence. However, based on the observed phylogenetic distance in the concatenated  
87 marker tree, we suggest that these organisms represent a new clade within the  
88 *Rhodobacteraceae*, and possibly a family-level clade previously without a reference sequence  
89 within the *Alphaproteobacteria*. We propose that NP970, SAT68, and MED800 represent three  
90 species within the same genus (tentatively named, '*Candidatus Luxescamonas taraoceani*'), with  
91 EAC638 as a representative of a species in a sister genus (tentatively named, '*Candidatus*  
92 *Luxescabacter africanus*').

93 In addition to Rubisco, all four genomes contained genes encoding phosphoribulokinase,  
94 an essential gene of the CBB cycle, and 50-89% of the genes necessary to perform complete  
95 carbon fixation (Fig. 5). The RCII genes in MED800, EAC638, SAT68, and NP970 were  
96 accompanied by bacteriochlorophyll biosynthesis and light-harvesting genes (Supplementary  
97 Data File 2). This complement of reaction center, bacteriochlorophyll biosynthesis, and essential  
98 carbon fixation genes support a role for autotrophy within these organisms beyond the identified  
99 marker genes.

100 All four genomes possessed ATP-binding cassette (ABC) type transporters for  
101 spermidine/putrescine and L- and branched-chain amino acids. These transporters are indicative  
102 of the utilization of organic nitrogen compounds, as spermidine and putrescine are nitrogen rich  
103 organic compounds, while the scavenging of amino acids reduces the overall nitrogen demands  
104 of the cell. Further, the genomes lacked transporters and degradation enzymes for many of the  
105 saccharides common in the marine environment<sup>18</sup> (Fig. 5). However, MED800, SAT68, and  
106 NP970 possessed an ABC-type  $\alpha$ -glucoside transporter, an annotated  $\beta$ -glucosidase in SAT68,  
107 and D-xylose and D-ribose ABC-type transporters in EAC638. While autotrophs are generally  
108 considered to not require external sources of organic carbon, saccharide transporters are  
109 commonly observed in classical photoautotrophic organisms<sup>19,20</sup>, including the specific example  
110 of  $\alpha$ -glucoside transporters in strains of *Synechocystis*<sup>21</sup>. For the four genomes, the minimal  
111 number of carbon transport and degradation genes may suggest that the organisms have a limited  
112 capacity to utilize dissolved organic carbon compounds, but are capable of heterotrophic growth  
113 under certain conditions. As such, the genomic potential of these organisms suggest that NP970,  
114 SAT68, MED800, and EAC638 are likely facultative autotrophs or mixotrophs.

115 In oxygenic photosynthesis, electrons are donated as a result of the oxidation of water.  
116 Lacking photosystem II, organisms with RCII are incapable of oxidizing water and would  
117 require an alternative electron donor for autotrophic processes. EAC638 and SAT68 contained  
118 the full/partial suite of genes necessary for thiosulfate oxidation, while MED800, NP970, and  
119 SAT68 possessed the genes for oxidizing sulfite. The oxidation of sulfur compounds has  
120 previously been linked to autotrophy in the marine environment<sup>22</sup>. The oxidation of organic  
121 sulfur compounds, like dimethyl sulfide, has been shown to be a source of thiosulfate<sup>23</sup> and

122 sulfite<sup>24</sup> in the marine environment. Electrons derived from inorganic sulfur sources (thiosulfate  
123 and/or sulfite) could be transferred directly through cytochromes or membrane-bound quinone  
124 dehydrogenases to the electron transport chain. The cycling of electrons through the reaction  
125 centers could generate the proton motive force necessary to generate NADH via reverse electron  
126 flow<sup>25</sup>, convert NADH to NADPH via transhydrogenase, and generate ATP for the CBB cycle  
127 (Fig. 5).

128 The reconstruction of four genomes from the same novel family in four different  
129 provinces (North Pacific, Mediterranean, East Africa coastal current, and South Atlantic)  
130 suggests that the observed genomes represent an *in situ* microbial population from the surface  
131 marine environment. Each of the genomes recruit metagenomic reads from multiple sampling  
132 sites in each province and are present at >0.1% of the microbial relative abundance (range: 0.1-  
133 1.04%; mean: 0.286%) in 20 samples (Fig. 1; Supplemental Information 1). Predominantly, the  
134 genomes were present in samples are located in the surface (n = 5) or DCM (n = 12). These  
135 organisms were collected at depths where light was available for photosynthesis and less  
136 frequently identified at deeper depths (n = 3 mesopelagic samples). When >0.1% relative  
137 abundance, the genomes tend to be more abundant in the ‘bacterial’/‘girus’ size fraction (n = 14),  
138 though were also observed in ‘protistan’ (n = 4), and ‘viral’ (n = 2) size fractions (Supplemental  
139 Information 1). The nature of the ‘bacterial’ size fractions suggests that these organisms are  
140 generally not particle attached and <1.6µm in size. The occurrence in the protistan fraction may  
141 be due to slightly larger cells or attachment to particles, but this data are difficult to interpret as  
142 the ‘protistan’ and ‘bacterial’ size fractions can overlap (0.8-1.6µm). As members of the free-  
143 living bacterioplankton, these organisms should be poised to grow in aerobic conditions. All four  
144 genomes possessed the genes encoding for cytochromes involved in aerobic metabolisms (aa<sub>3</sub>-  
145 and bc<sub>1</sub>-type), and lacked the genes for cytochromes involved in microaerobic metabolisms and  
146 alternative electron acceptors. Further, all four genomes encoded the gene for an oxygen-  
147 dependent ring cyclase (*acsF*), a necessary component in bacteriochlorophyll biosynthesis for  
148 which there is alternative that is oxygen-independent (*bchE*) and used by anaerobic organisms.

149 With this discovery, the potential photosynthesis in the ocean has expanded beyond  
150 organisms harboring chlorophyll *a* to include *Alphaproteobacteria* with BChl *a*. Though these  
151 organisms have not been cultivated or sequenced before, both PufM and Rubisco in MED800,  
152 EAC638, NP970, and SAT68 are phylogenetically related to environmentally-derived protein  
153 sequences, lending credence to the fact that these organisms may be a persistent element of  
154 oceanic carbon fixation. As such, clades of environmentally sampled genes (*rbsL* and *pufM*) can  
155 now be linked to a previously unrecognized source of marine primary productivity. The  
156 identification of a globally distributed clade of AAnPs in the ocean capable of carbon fixation  
157 continues to expand our understanding of photosynthesis and the marine carbon cycle.

## 158 **Materials and Methods:**

### 159 *Assembly*

160 All sequences for the reverse and forward reads from each sampled station and depth within the  
161 *Tara Oceans* dataset were accessed from European Molecular Biology Laboratory (EMBL)<sup>10,11</sup>.  
162 Typically, *Tara* sampling sites have multiple metagenomic samples, representing different  
163 sampling depths and size fractions. The common size fractions were used during sampling were:  
164 ‘bacterial’ (0.22-1.6µm) (includes Mediterranean ‘girus’ samples), ‘protistan’ (0.8-5.0µm),  
165 ‘girus’ (0.45-0.8µm) and ‘viral’ (<0.22µm). Surface samples were collected at ~5-m depth, while

166 deep chlorophyll maximum (DCM) and mesopelagic depths were variable depending the  
167 physiochemical features of the site. Paired-end reads from different filter sizes from each site and  
168 depth (e.g., TARA0007, girus filter fraction, sampled at the DCM) were assembled using  
169 Megahit<sup>26</sup> (v1.0.3; parameters: --preset, meta-sensitive) (Supplementary Data File 1). All of the  
170 Megahit assemblies from each province were pooled in to two tranches based on assembly size,  
171 <2kb and ≥2kb. Longer assemblies (≥2kb) with ≥99% semi-global identity were combined using  
172 CD-HIT-EST<sup>27</sup> (v4.6; -T 90 -M 500000 -c 0.99 -n 10). The reduced set of contiguous DNA  
173 fragments (contigs) ≥2kb was then cross-assembled using Minimus2<sup>28</sup> (AMOS v3.1.0;  
174 parameters: -D OVERLAP=100 MINID=95).

### 175 *Binning*

176 Contigs from each province were initially clustered into tentative genomic bins using  
177 BinSanity<sup>29</sup>. Due to computational limitations, the South Atlantic, East African Coastal province,  
178 and Mediterranean Sea were initially run with contig size cutoffs of 11.5kbp, 7.5kbp, and 7kbp,  
179 respectively. The BinSanity workflow was run iteratively three times using variable preference  
180 values (v.0.2.5.5; parameters: -p [(1) -10, (2) -5, (3) -3] -m 4000 -v 400 -d 0.95). Between each  
181 of the three main clustering steps, refinement was performed based on sequence composition  
182 (parameters: -p [(1) -25, (2) -10, (3) -3] -m 4000 -v 400 -d 0.95 -kmer 4). After refinement and  
183 before the next pass with BinSanity, bins were evaluated using CheckM<sup>30</sup> (v.1.0.3; parameters:  
184 lineage\_wf, default settings) for completion and redundancy. Genomes were considered for  
185 further analysis based on the completeness and contamination metrics. The cutoff values were:  
186 >90% complete with <10% contamination, 80-90% complete with <5% contamination, or 50-  
187 80% complete with <2% contamination. Bins meeting these metrics were reclassified as draft  
188 genomes were removed from subsequent rounds of clustering. After identification of the four  
189 genomes of interest (initially 51-84% complete, <7.0% contamination), binning was performed  
190 with CONCOCT<sup>31</sup> (v.0.4.1; parameters: -c 800 -I 500) on contigs >5kb from each province that  
191 had a produced a genome of interest. To improve completion estimates, overlapping CONCOCT  
192 and BinSanity bins were visualized using Anvi'o<sup>32</sup> (v.2.1.0) and manually refined to improve  
193 genome completion and minimize contamination estimates (Extended Data Fig. 3-6).

### 194 *Annotation*

195 Putative DNA coding sequences (CDSs) were predicted for each genome using Prodigal<sup>33</sup>  
196 (v.2.6.2; -m -p meta). Putative CDS were submitted for annotation by the KEGG database using  
197 BlastKOALA<sup>12</sup> (taxonomy group, Prokaryotes; database, genus\_prokaryotes +  
198 family\_eukaryotes; Accessed March 2017) (Supplementary Data File Table 3). Assessment of  
199 pathways and metabolisms of interest were determined using the script KEGG-decoder.py  
200 ([www.github.com/bjtully/BioData/tree/master/KEGGDecoder](http://www.github.com/bjtully/BioData/tree/master/KEGGDecoder)). Genomes of interested were  
201 determined based on the presence of genes assigned as the M subunit of type-II photochemical  
202 reaction center (PufM) and ribulose-1,5-bisphosphate carboxylase (RbsLS). After confirmation  
203 of the genes of interest (see below), additional annotations were performed for the genomes  
204 using the Rapid Annotation using Subsystem Technology (RAST) service (Classic RAST default  
205 parameters - Release70)<sup>34</sup>.

### 206 *Phylogeny*

207 An initial assessment of phylogeny was conducted using pplacer<sup>35</sup> within CheckM. The  
208 Prodigal-derived CDSs were searched for a collection of single-copy marker genes that was  
209 common to all four *Tara* assembled genomes using hidden Markov models collected from the

210 Pfam database<sup>36</sup> (Accessed March 2017) and HMMER<sup>37</sup> (v3.1b2; parameters: hmmsearch -E  
211 1e-10 --notextw). 17 marker genes were identified that met this criteria<sup>38-40</sup> (Extended Data  
212 Table 1). The 17 markers were identified in 2,889 reference genes from complete and partial  
213 genomes accessed from NCBI Genbank<sup>41</sup> (Supplementary Data File 4). If a genome contained  
214 multiple copies of a single marker gene both were excluded from the final tree. Only genomes  
215 containing  $\geq 10$  markers were used for phylogenetic placement. Each marker set was aligned  
216 using MUSCLE<sup>42</sup> (v3.8.31; parameter: -maxiters 8) and trimmed using TrimAL<sup>43</sup> (v.1.2rev59;  
217 parameter: -automated1). Alignments were then manually assessed and concatenated in  
218 Geneious<sup>44</sup>. An approximate maximum likelihood tree was generated using FastTree<sup>45</sup> (v.2.1.10;  
219 parameters: -lg -gamma; Supplementary Data File 5). A simplified version of this phylogenetic  
220 tree was constructed using the same protocol, but with 160 reference genomes for Fig. 2  
221 (Supplementary Data File 6 and 7).

### 222 *Phylogenetic tree – Rubisco and Type-II Reaction Center*

223 RbsL and PufM sequences representing previously described lineages were collected<sup>13,17</sup>  
224 (Supplementary Data File 8 and 9). Additional reference PufM sequences were collected from  
225 environmentally generated bacterial artificial chromosomes<sup>5</sup> and Integrated Microbial Genomes  
226 (IMG; Accessed Feb 2017)<sup>46</sup>. Protein sequences from IMG were assessed based on genomes  
227 with KEGG Ontology (KO) annotations<sup>47</sup> for the reaction center subunit M (K08929). PufM  
228 sequences from Prodigal predicted CDS (as above) of Global Ocean Survey (GOS) assemblies<sup>16</sup>  
229 were identified using DIAMOND<sup>48</sup> (v.0.8.36.98; parameters: BLASTP, default settings), where  
230 all reference and *Tara* genome sequences were used as a query. Two separate phylogenetic trees  
231 were constructed (RbsL and PufM) using the following methodology. Sequences were aligned  
232 using MUSCLE<sup>42</sup> (parameter: -maxiters 8) and automatically trimmed using TrimAL<sup>43</sup>  
233 (parameter: -automated1) (Supplementary Data File 10 and 11). After manual assessment,  
234 trimmed alignments were used to construct approximately-maximum-likelihood phylogenetic  
235 trees using FastTree<sup>45</sup> (parameters: -lg -gamma) (Supplementary Data File 12 and 13).

### 236 *Relative abundance of genomes in each sample*

237 Reads from each sample were recruited against all assemblies  $\geq 2$ kb from the same province  
238 using Bowtie2<sup>49</sup> (parameters: default settings), under the assumptions that contigs  $< 2$ kb would  
239 include, low abundance bacteria and archaea, bacteria and archaea with high degrees of  
240 repeats/assembly poor regions, fragmented picoeukaryotic genomes, and problematic read  
241 sequences (low quality, sequencing artefacts, etc.). For the four sets of contigs (North Pacific,  
242 Mediterranean, East Africa Coastal province, and South Atlantic), putative CDS were  
243 determined via Prodigal (parameters: see above). In order to estimate the relative abundance of  
244 the four analyzed genomes within the bacteria and archaea portion of the total microbial  
245 community (excluding eukaryotes and viruses), single-copy marker genes were identified using a  
246 collection of previously identified HMMs<sup>50,51</sup> and searched using HMMER<sup>37</sup> (hmmsearch --  
247 notextw --cut\_tc). Markers belonging to the four genomes were isolated from the total set of  
248 environmental markers. The number of reads aligned to each marker was determined using  
249 BEDTools<sup>52</sup> (v2.17.0; multicov default parameters). Length-normalized relative abundance  
250 values were determined for each genome as in Equation 1 (Supplementary Data File 1):

$$251 \quad \frac{\sum \text{Reads bp}^{-1} \text{ genome markers}}{\sum \text{Reads bp}^{-1} \text{ metagenome contig markers}} \times 100 \quad (1)$$

252 *Data availability*

253 Data is available... submission to NCBI is ongoing. [Currently data is available at FigShare,  
254 including high resolution copies of figures, contig and protein sequences, and all supplementary  
255 data files: <https://figshare.com/s/9f603e9bbef71164e61b>]

256 **References:**

- 257 1. Bėjá, O., Spudich, E. N., Spudich, J. L., Leclerc, M. & DeLong, E. F. Proteorhodopsin phototrophy in the  
258 ocean. *Nature* **411**, 786–789 (2001).
- 259 2. Harashima, K., Kawazoe, K., Yoshida, I. & Kamata, H. Light-Stimulated Aerobic Growth of Erythrobacter  
260 Species Och-114. *Plant and Cell Physiology* **28**, 365–374 (1987).
- 261 3. Schwalbach, M. S. & Fuhrman, J. A. Wide-ranging abundances of aerobic anoxygenic phototrophic bacteria  
262 in the world ocean revealed by epifluorescence microscopy and quantitative PCR. *Limnology and*  
263 *Oceanography* **50**, 620–628 (2005).
- 264 4. Koblížek, M. Ecology of aerobic anoxygenic phototrophs in aquatic environments. *FEMS Microbiol. Rev.*  
265 **39**, 854–870 (2015).
- 266 5. Bėjá, O. *et al.* Unsuspected diversity among marine aerobic anoxygenic phototrophs. *Nature* **415**, 630–633  
267 (2002).
- 268 6. Kang, I. *et al.* Genome Sequence of Fulvimarina pelagi HTCC2506T, a Mn(II)-Oxidizing  
269 Alphaproteobacterium Possessing an Aerobic Anoxygenic Photosynthetic Gene Cluster and  
270 Xanthorhodopsin. *J. Bacteriol.* **192**, 4798–4799 (2010).
- 271 7. Frigaard, N.-U. Biotechnology of Anoxygenic Phototrophic Bacteria. *Adv. Biochem. Eng. Biotechnol.* **156**,  
272 139–154 (2016).
- 273 8. Hauruseu, D. & Koblížek, M. Influence of Light on Carbon Utilization in Aerobic Anoxygenic Phototrophs.  
274 *Appl. Environ. Microbiol.* **78**, 7414–7419 (2012).
- 275 9. Moran, M. A. *et al.* Deciphering ocean carbon in a changing world. *Proceedings of the National Academy of*  
276 *Sciences* **113**, 3143–3151 (2016).
- 277 10. Pesant, S. *et al.* Open science resources for the discovery and analysis of Tara Oceans data. *Sci. Data* **2**,  
278 150023–16 (2015).
- 279 11. Sunagawa, S. *et al.* Ocean plankton. Structure and function of the global ocean microbiome. *Science* **348**,  
280 1261359–1261359 (2015).
- 281 12. Kanehisa, M., Sato, Y. & Morishima, K. BlastKOALA and GhostKOALA: KEGG Tools for Functional  
282 Characterization of Genome and Metagenome Sequences. *Journal of Molecular Biology* **428**, 726–731  
283 (2016).
- 284 13. Tabita, F. R. *et al.* Function, Structure, and Evolution of the RubisCO-Like Proteins and Their RubisCO  
285 Homologs. *Microbiol. Mol. Biol. Rev.* **71**, 576–599 (2007).
- 286 14. Badger, M. R. & Bek, E. J. Multiple Rubisco forms in proteobacteria: their functional significance in  
287 relation to CO<sub>2</sub> acquisition by the CBB cycle. *Journal of Experimental Botany* **59**, 1525–1541 (2007).
- 288 15. Rusch, D. B. *et al.* The Sorcerer II Global Ocean Sampling Expedition: Northwest Atlantic through Eastern  
289 Tropical Pacific. *Plos Biol* **5**, e77 (2007).
- 290 16. Venter, J. C. *et al.* Environmental genome shotgun sequencing of the Sargasso Sea. *Science* **304**, 66–74  
291 (2004).
- 292 17. Yutin, N. *et al.* Assessing diversity and biogeography of aerobic anoxygenic phototrophic bacteria in surface  
293 waters of the Atlantic and Pacific Oceans using the Global Ocean Sampling expedition metagenomes.  
294 *Environ. Microbiol.* **9**, 1464–1475 (2007).
- 295 18. Baker, B. J., Lazar, C. S., Teske, A. P. & Dick, G. J. Genomic resolution of linkages in carbon, nitrogen, and  
296 sulfur cycling among widespread estuary sediment bacteria. *Microbiome* **3**, 14 (2015).
- 297 19. Gómez-Baena, G. *et al.* Glucose Uptake and Its Effect on Gene Expression in Prochlorococcus. *PLoS ONE*  
298 **3**, e3416–11 (2008).
- 299 20. Michelou, V. K., Cottrell, M. T. & Kirchman, D. L. Light-Stimulated Bacterial Production and Amino Acid  
300 Assimilation by Cyanobacteria and Other Microbes in the North Atlantic Ocean. *Appl. Environ. Microbiol.*  
301 **73**, 5539–5546 (2007).
- 302 21. Kaneko, T. *et al.* Sequence analysis of the genome of the unicellular cyanobacterium Synechocystis sp.  
303 strain PCC6803. II. Sequence determination of the entire genome and assignment of potential protein-coding  
304 regions. *DNA Res.* **3**, 109–136 (1996).



- 305 22. Swan, B. K. *et al.* Potential for Chemolithoautotrophy Among Ubiquitous Bacteria Lineages in the Dark  
306 Ocean. *Science* **333**, 1296–1300 (2011).
- 307 23. de Zwart, J., Nelisse, P. N. & Kuenen, J. G. Isolation and characterization of Methylophaga sulfidovorans sp  
308 nov: An obligately methylotrophic, aerobic, dimethylsulfide oxidizing bacterium from a microbial mat.  
309 *FEMS Microbiol. Ecol.* **20**, 261–270 (1996).
- 310 24. Kelly, D. P., Baker, S. C., Trickett, J., Davey, M. & Murrell, J. C. Methanesulphonate utilization by a novel  
311 methylotrophic bacterium involves an unusual monooxygenase. *Microbiology* **140**, 1419–1426 (1994).
- 312 25. Fischer, W. W., Hemp, J. & Johnson, J. E. Evolution of Oxygenic Photosynthesis. *Annu. Rev. Earth Planet.*  
313 *Sci.* **44**, 647–683 (2016).
- 314 26. Li, D. *et al.* MEGAHIT v1.0: A fast and scalable metagenome assembler driven by advanced methodologies  
315 and community practices. *Methods* **102**, 3–11 (2016).
- 316 27. Fu, L., Niu, B., Zhu, Z., Wu, S. & Li, W. CD-HIT: accelerated for clustering the next-generation sequencing  
317 data. *Bioinformatics* **28**, 3150–3152 (2012).
- 318 28. Treangen, T. J., Sommer, D. D., Angly, F. E., Koren, S. & Pop, M. Next generation sequence assembly with  
319 AMOS. *Curr Protoc Bioinformatics* **Chapter 11**, Unit 11.8 (2011).
- 320 29. Graham, E. D., Heidelberg, J. F. & Tully, B. J. BinSanity: unsupervised clustering of environmental  
321 microbial assemblies using coverage and affinity propagation. *PeerJ* **5**, e3035–19 (2017).
- 322 30. Parks, D. H., Imelfort, M., Skennerton, C. T., Hugenholtz, P. & Tyson, G. W. CheckM: assessing the quality  
323 of microbial genomes recovered from isolates, single cells, and metagenomes. *Genome Res.* **25**, 1043–1055  
324 (2015).
- 325 31. Alneberg, J. *et al.* Binning metagenomic contigs by coverage and composition. *Nat Meth* **11**, 1144–1146  
326 (2014).
- 327 32. Eren, A. M. *et al.* Anvi'o: an advanced analysis and visualization platform for 'omics data. *PeerJ* **3**, e1319  
328 (2015).
- 329 33. Hyatt, D., LoCasio, P. F., Hauser, L. J. & Uberbacher, E. C. Gene and translation initiation site prediction  
330 in metagenomic sequences. *Bioinformatics* **28**, 2223–2230 (2012).
- 331 34. Aziz, R. K. *et al.* The RAST Server: Rapid Annotations using Subsystems Technology. *BMC Genomics* **9**,  
332 75 (2008).
- 333 35. Matsen, F. A., Kodner, R. B. & Armbrust, E. V. pplacer: linear time maximum-likelihood and Bayesian  
334 phylogenetic placement of sequences onto a fixed reference tree. *BMC Bioinformatics* **11**, 538 (2010).
- 335 36. Bateman, A. *et al.* The Pfam Protein Families Database. *Nucleic Acids Res.* **30**, 276–280 (2002).
- 336 37. Finn, R. D., Clements, J. & Eddy, S. R. HMMER web server: interactive sequence similarity searching.  
337 *Nucleic Acids Res.* **39**, W29–W37 (2011).
- 338 38. Wu, D., Jospin, G. & Eisen, J. A. Systematic Identification of Gene Families for Use as 'Markers' for  
339 Phylogenetic and Phylogeny-Driven Ecological Studies of Bacteria and Archaea and Their Major  
340 Subgroups. *PLoS ONE* **8**, e77033–11 (2013).
- 341 39. Santos, S. R. & Ochman, H. Identification and phylogenetic sorting of bacterial lineages with universally  
342 conserved genes and proteins. *Environ. Microbiol.* **6**, 754–759 (2004).
- 343 40. Alexandre, A., Laranjo, M., Young, J. P. W. & Oliveira, S. dnaJ is a useful phylogenetic marker for  
344 alphaproteobacteria. *Int. J. Syst. Evol. Microbiol.* **58**, 2839–2849 (2008).
- 345 41. Benson, D. A. *et al.* GenBank. *Nucleic Acids Res.* **28**, 15–18 (2000).
- 346 42. Edgar, R. C. MUSCLE: multiple sequence alignment with high accuracy and high throughput. *Nucleic Acids*  
347 *Res.* **32**, 1792–1797 (2004).
- 348 43. Capella-Gutiérrez, S., Silla-Martínez, J. M. & Gabaldón, T. trimAl: a tool for automated alignment trimming  
349 in large-scale phylogenetic analyses. *Bioinformatics* **25**, 1972–1973 (2009).
- 350 44. Kearsley, M. *et al.* Geneious Basic: an integrated and extendable desktop software platform for the  
351 organization and analysis of sequence data. *Bioinformatics* **28**, 1647–1649 (2012).
- 352 45. Price, M. N., Dehal, P. S. & Arkin, A. P. FastTree 2--approximately maximum-likelihood trees for large  
353 alignments. *PLoS ONE* **5**, e9490 (2010).
- 354 46. Markowitz, V. M. *et al.* The integrated microbial genomes (IMG) system. *Nucleic Acids Res.* **34**, D344–8  
355 (2006).
- 356 47. Kanehisa, M., Sato, Y., Kawashima, M., Furumichi, M. & Tanabe, M. KEGG as a reference resource for  
357 gene and protein annotation. *Nucleic Acids Res.* **44**, D457–D462 (2016).
- 358 48. Buchfink, B., Xie, C. & Huson, D. H. Fast and sensitive protein alignment using DIAMOND. *Nat Meth* **12**,  
359 59–60 (2014).
- 360 49. Langmead, B. & Salzberg, S. L. Fast gapped-read alignment with Bowtie 2. *Nat Meth* **9**, 357–359 (2012).

- 361 50. Albertsen, M. *et al.* Genome sequences of rare, uncultured bacteria obtained by differential coverage binning  
362 of multiple metagenomes. *Nat Biotechnol* **31**, 533–538 (2013).  
363 51. Tully, B. J. & Heidelberg, J. F. Potential Mechanisms for Microbial Energy Acquisition in Oxic Deep-Sea  
364 Sediments. *Appl. Environ. Microbiol.* **82**, 4232–4243 (2016).  
365 52. Quinlan, A. R. & Hall, I. M. BEDTools: a flexible suite of utilities for comparing genomic features.  
366 *Bioinformatics* **26**, 841–842 (2010).  
367

### 368 **Acknowledgments:**

369 We would like to acknowledge and thank Drs. Eric Webb and William Nelson for providing  
370 invaluable comments and critiques in the early stages of this research. We are indebted to the  
371 *Tara Oceans* consortium for their commitment to open-access data that allows data aficionados  
372 to indulge in the data and attempt to add to the body of science contained within. And we thank  
373 the Center for Dark Energy Biosphere Investigations (C-DEBI) for providing funding to BJT and  
374 JFH (OCE-0939654). This is C-DEBI contribution number ###.

375 **Author contributions:** BJT conceived of the research plan, performed analysis, and wrote the  
376 manuscript. EDG performed analysis and wrote the manuscript. JFH provided funding, provided  
377 guidance, and edited the manuscript.

378 **Competing financial interests:** The authors declare no conflict of interest.  
379

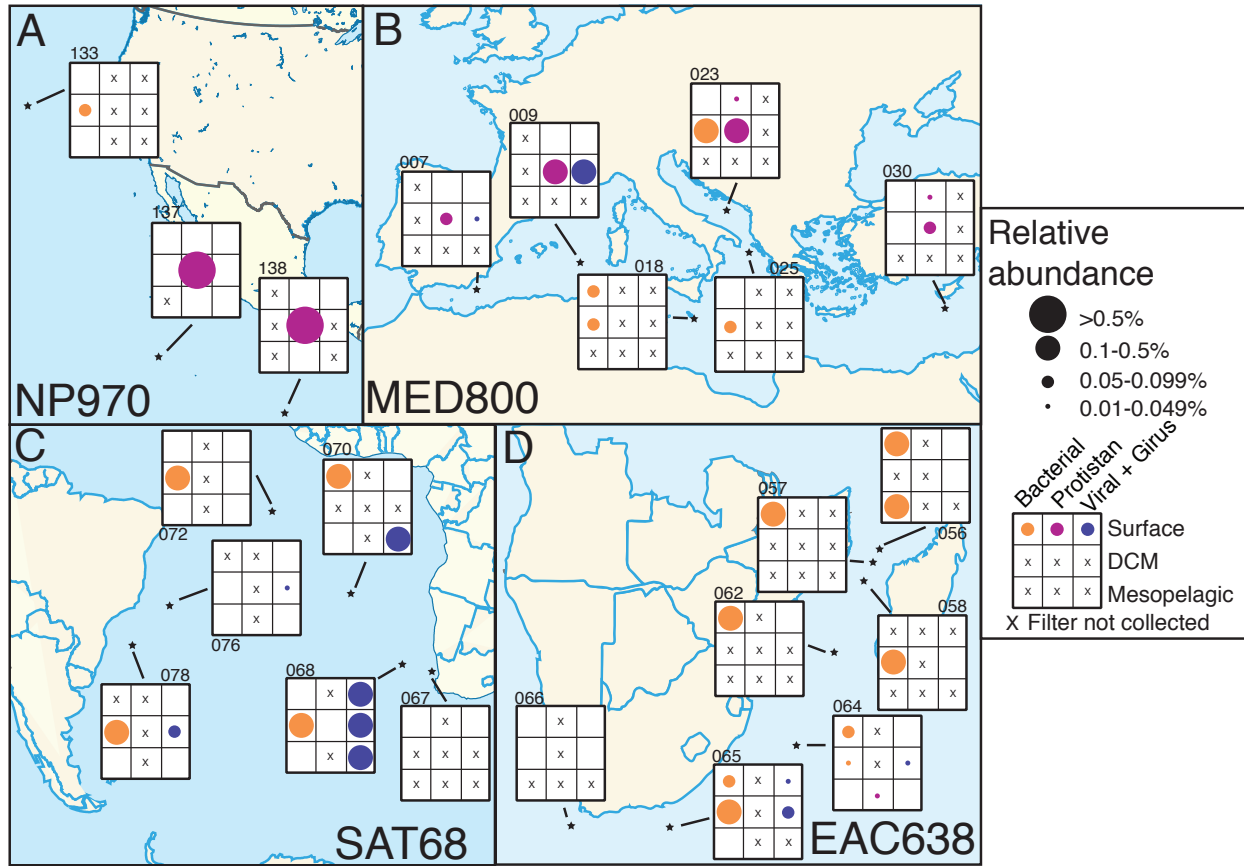

380

381 **Fig. 1.** The approximate locations of *Tara Oceans* sampling sites used to generate metagenomes  
 382 incorporated in to this study. Each grid represents the three possible sample depths and filter  
 383 fractions (top row: surface, middle row: DCM, bottom row: mesopelagic). An 'X' denotes that  
 384 no sample was collected for that depth and size fraction at the site. Circle size represents  
 385 relative abundance. (A) North Pacific – NP 970, (B) Mediterranean Sea – MED800, (C) South Atlantic  
 386 – SAT68, and (D) East Africa current – EAC638. Size fraction: orange, 'bacterial' (0.22-1.6 $\mu$ m);  
 387 purple, 'protistan' (0.8-5.0 $\mu$ m); blue, 'girus'+ 'viral' (<0.22-0.8 $\mu$ m). The maps in Figure 1 were  
 388 modified under a CC BY-SA 3.0 license from 'South Atlantic Ocean laea location map' by  
 389 Tentotwo, 'North America laea location map' by TUBS, 'Location of Mozambique in Africa' by  
 390 Rei-artur, and 'Blank Map of South Europe and North Africa' by historicair.  
 391

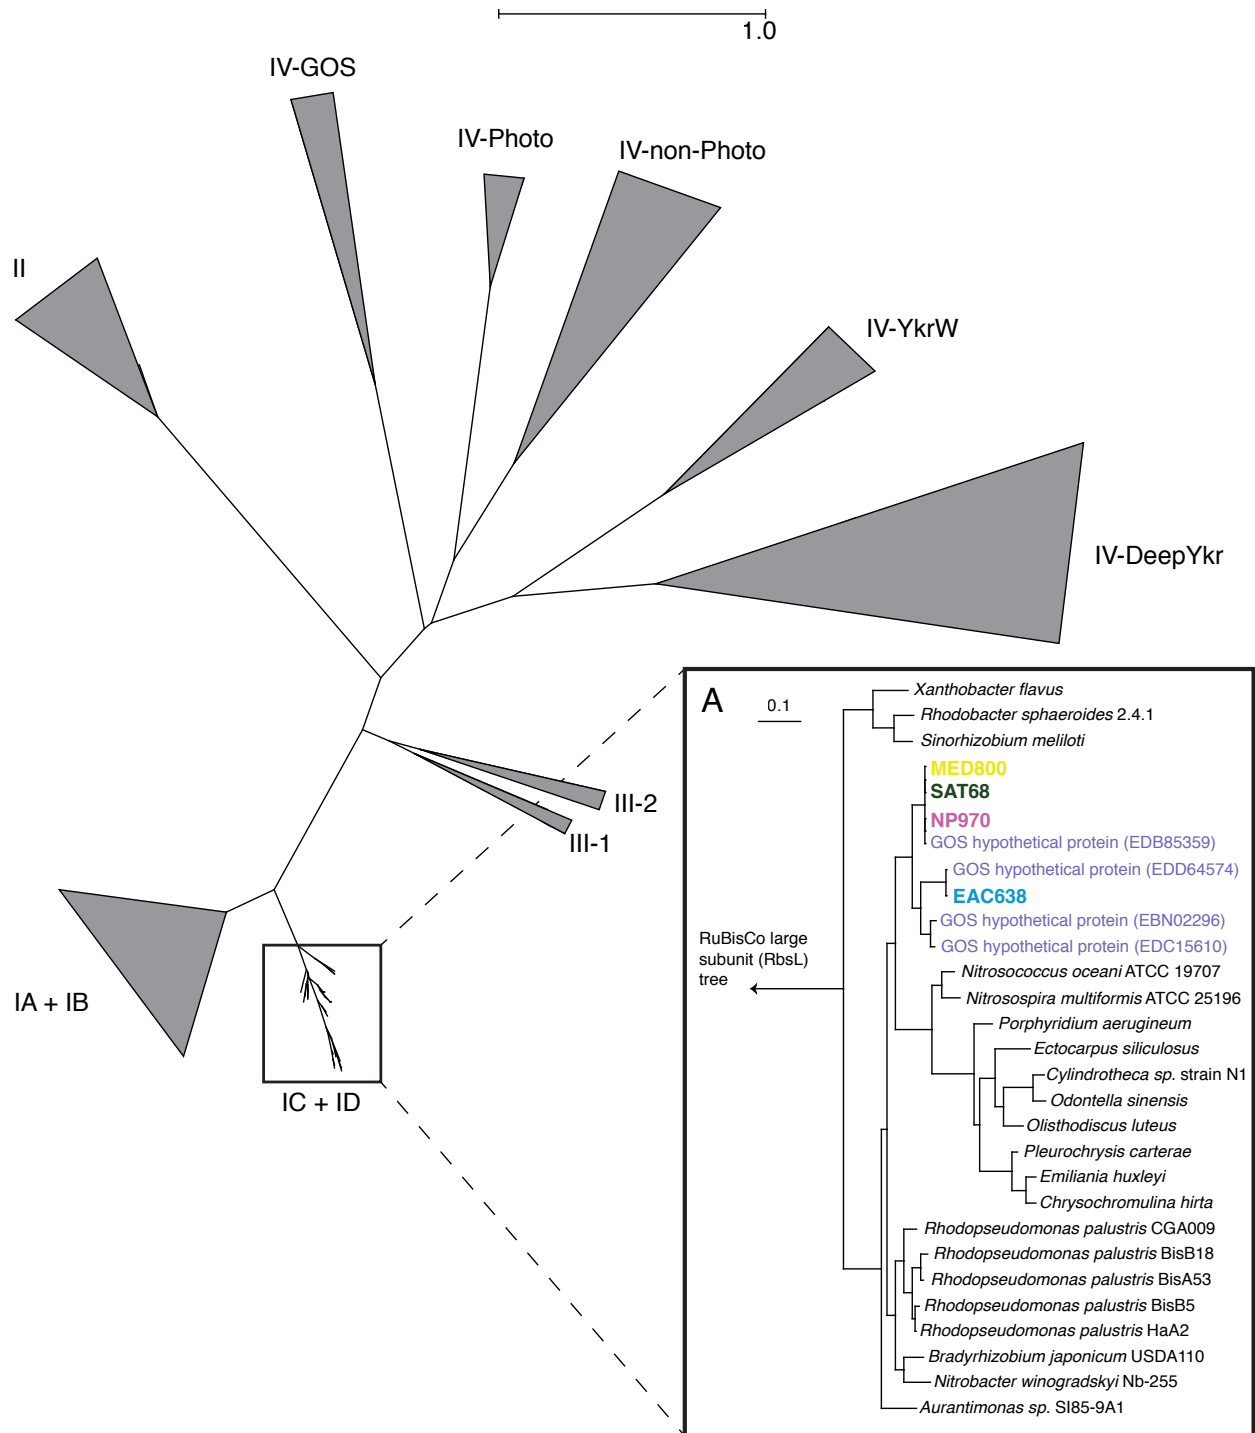



400 **Extended Data Fig. 3.** Phylogenetic tree of the M subunit of type-II photochemical reaction  
401 center (PufM). Environmental sequences obtained from the Global Ocean Survey (purple, •) and  
402 BÉjÁ *et al.* (2002) (pink, •) are highlighted. Boxes illustrate approximate positions of  
403 phylogroups previously assigned by Yutin *et al.* (2007). Sequences used for this tree can be  
404 found in Supplementary Data File 11. Phylogenetic distances and local support values can be  
405 found in Supplementary Data File 13. Sequence information, including accession numbers and  
406 taxonomies can be found in Supplementary Data File 9.  
407

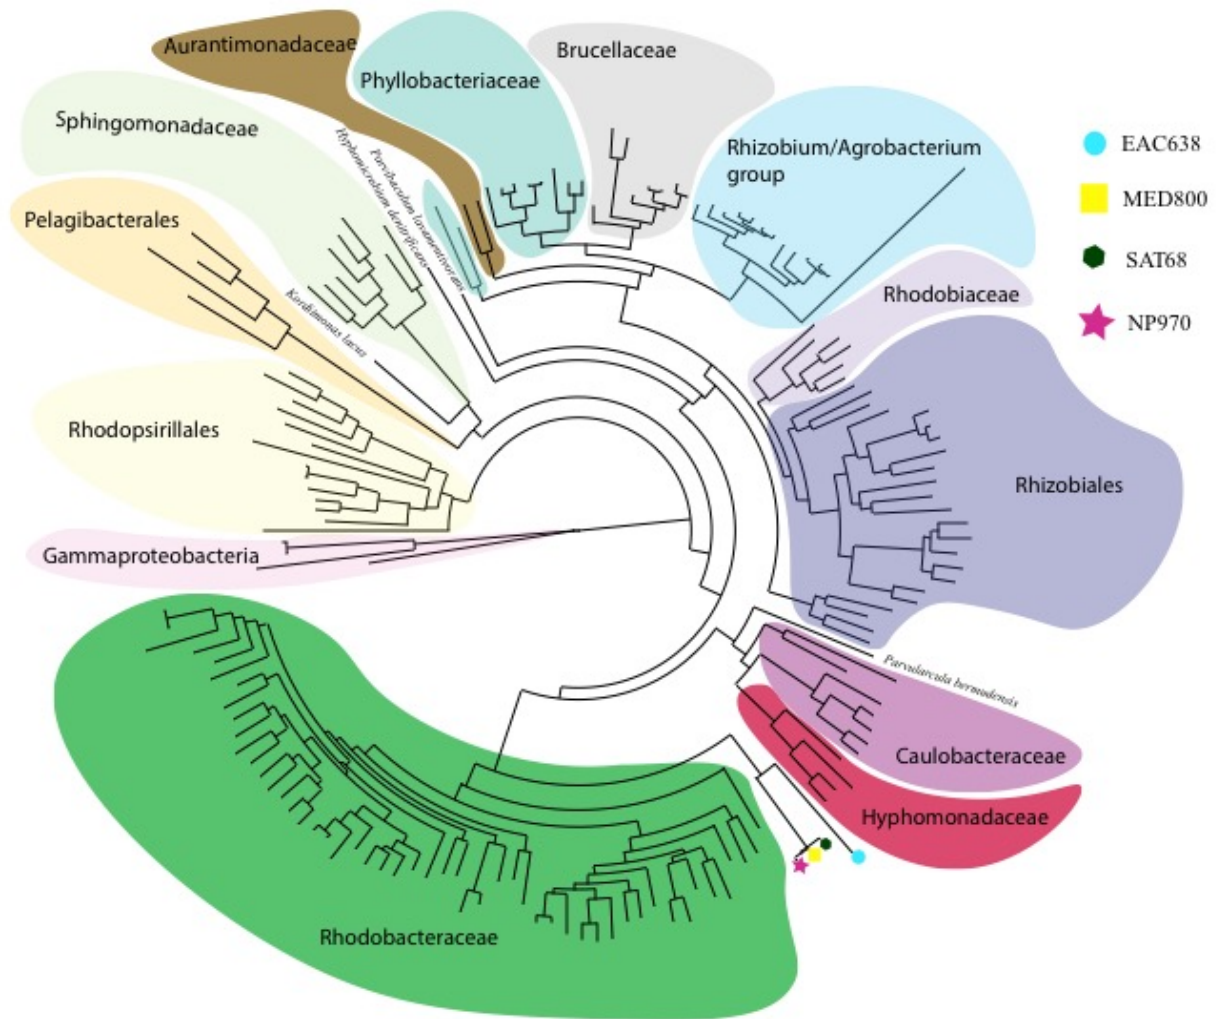

408

409 **Fig. 4.** Approximate maximum likelihood *Alphaproteobacteria* phylogenetic tree of 17  
410 concatenated single-copy marker genes for the *Tara* assembled and 160 reference genomes.  
411 Reference sequences from the *Gammaproteobacteria* used as an outgroup. Reference genome  
412 information, including accession numbers, can be found in Supplementary Data File 4.  
413 Phylogenetic distances and local support values can be found in Supplementary Data File 5.

414





424 **Table 1.** Statistics of the four *Tara* assembled genomes.

| Genome ID | No. of contigs | Total length (bp) | Max. contig length (bp) | N50    | Mean length (bp) | GC (%) | No. of predicted CDS <sup>◇</sup> | Est. Completeness (%) <sup>*</sup> | Est. duplication/redundancy (Est. strain heterogeneity) (%) <sup>*</sup> |
|-----------|----------------|-------------------|-------------------------|--------|------------------|--------|-----------------------------------|------------------------------------|--------------------------------------------------------------------------|
| MED800    | 174            | 2,140,579         | 55,951                  | 13,831 | 12,302           | 36.7   | 2,184                             | 66.98                              | 2.36 (100.0)                                                             |
| SAT68     | 192            | 2,295,506         | 63,422                  | 13,440 | 11,956           | 36.8   | 2,334                             | 85.02                              | 5.37 (75.0)                                                              |
| EAC638    | 121            | 1,868,409         | 80,916                  | 19,502 | 15,441           | 30.7   | 1,939                             | 68.88                              | 4.75 (75.0)                                                              |
| NP970     | 120            | 2,585,639         | 84,649                  | 32,137 | 21,547           | 36.1   | 2,445                             | 82.04                              | 3.04 (33.33)                                                             |

425 ◇, as determined using Prodigal

426 \*, as determine using CheckM with the Alphaproteobacteria markers (225 markers in 148 sets)

427 N50 - length of contig for which all contigs longer in length contain half of the total genome

428 CDS - coding DNA sequence
